# Supplementary material
Source: publisher figshare collection journal article supplement (https://acs.figshare.com/ndownloader/files/4191220)
Supplement: Supplementary file 1 [file 4191220]

## Supporting Information

### **High-efficiency removal of NO<sub>x</sub> using a combined adsorption-discharge plasma catalytic process**

Qinqin Yu<sup>#</sup>, Hui Wang<sup>#</sup>, Tong Liu, Liping Xiao, Xiaoyuan Jiang, Xiaoming Zheng<sup>\*</sup>

*Key Lab of Applied Chemistry of Zhejiang Province, Department of Chemistry, Zhejiang  
University (XiXi Campus), Hangzhou 310028, China.*

*<sup>\*</sup>Corresponding author. Tel.: +86 571 88273417; Fax: +86 571 88273283*

*E-mail: [xmzheng@zju.edu.cn](mailto:xmzheng@zju.edu.cn) (Xiaoming Zheng)*

*<sup>#</sup>The authors contributed equally to this work*

Number of figures: 6

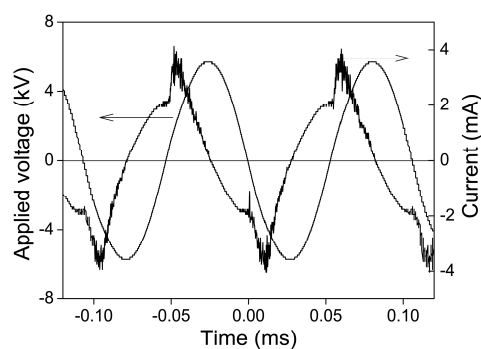

**Figure S1.** Waveforms of applied voltage and discharge current of the plasma.

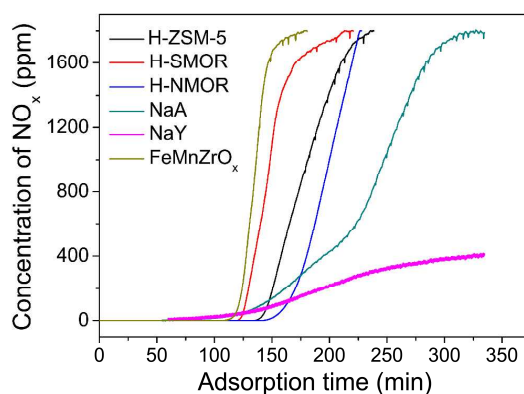

**Figure S2.** Breakthrough curves of  $\text{NO}_x$  on the catalysts.

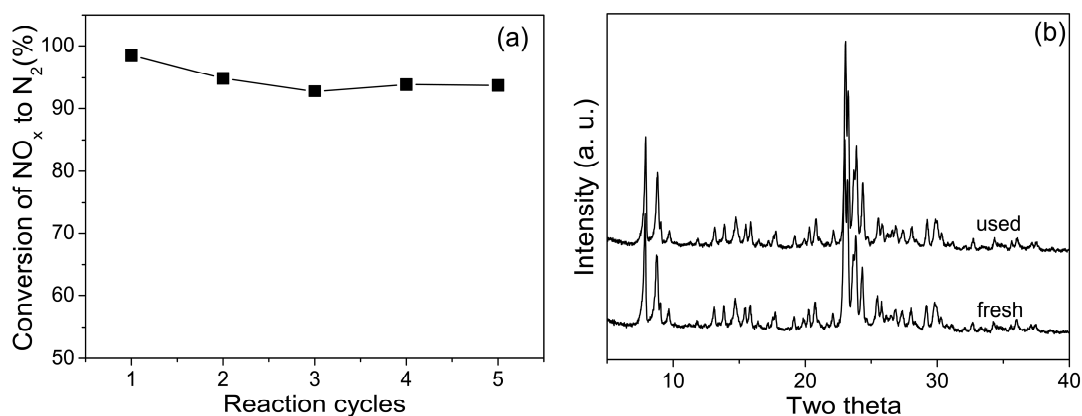

**Figure S3.** Cyclic performance of H-ZSM-5 in the adsorption-discharge process for  $\text{NO}_x$  removal (a) conversion of adsorbed  $\text{NO}_x$  (b) XRD patterns of H-ZSM-5 before and after 5-cycles' operation.

*Conditions:* in the adsorption stage, H-ZSM-5 adsorbed 0.645 mmol  $\text{NO}_x$ ; in the

discharge stage, 50 mL/min flow rate of Ar, discharge power is set at 3.6 W, total input energy of the plasma is fixed at 0.832 W·h.

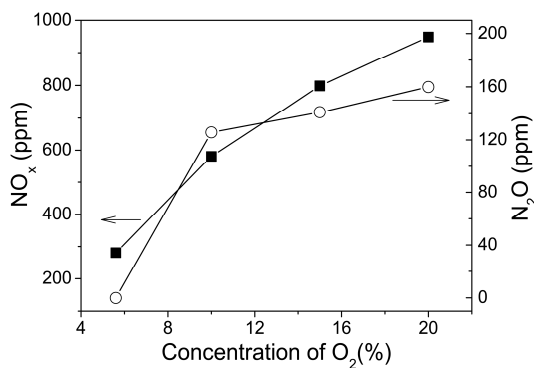

**Figure S4.** Reaction of O<sub>2</sub> with N<sub>2</sub> as a function of O<sub>2</sub> concentration in the DBD reactor.

*Conditions:* 50 mL/min of total flow rate, discharge power is set at 1.92 W.

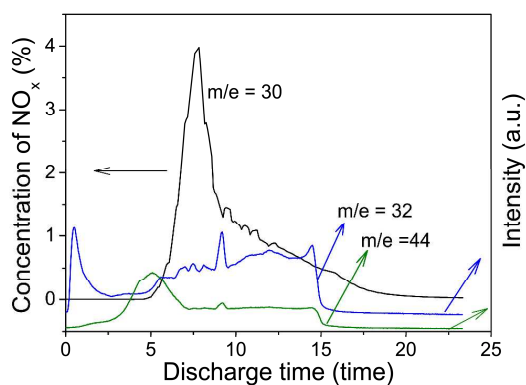

**Figure S5.** Effluents monitored by MS during decomposition of adsorbed NO<sub>x</sub> on H-ZSM-5 in N<sub>2</sub> plasma at a discharge power of 3.6 W.

Notably, the MS signal  $m/e = 30$  represents NO<sub>x</sub> (NO + NO<sub>2</sub>) in our MS

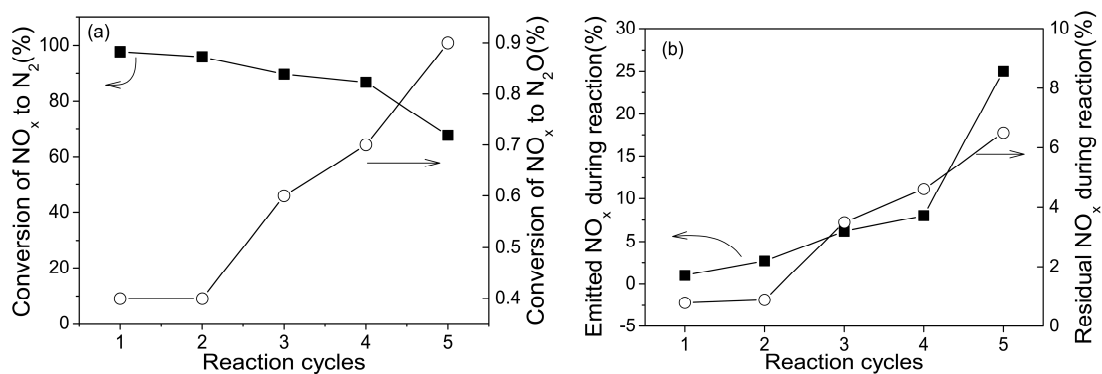

**Figure S6.** Cyclic operation of AC/H-ZSM-5 for the removal of NO<sub>x</sub> (a) conversion of adsorbed NO<sub>x</sub> (b) percentage of emitted NO<sub>x</sub> during reaction and residual NO<sub>x</sub> after reaction.

*Conditions:* in the adsorption stage, 0.645 mmol NO<sub>x</sub> adsorbed; in the discharge stage, 50 mL/min flow rate of N<sub>2</sub>, discharge power is 3.6 W, input energy of each cycle is 0.832W·h; between the intermission of two cycles, the AC/H-ZSM-5 should be treated in N<sub>2</sub> at 300 °C for 30 min, as without the procedure the conversion of NO<sub>x</sub> is similar to that on bare H-ZSM-5. Notably, the percentage of NO<sub>x</sub> remained on the catalyst after reaction is determined by the desorbed NO<sub>x</sub> during the pretreatment process, as most adsorbed NO<sub>x</sub> was desorbed in the temperature range (No other N-containing products were produced during the pretreatment process).
